# Supplementary material for: Alternative splicing links histone modifications to stem cell fate decision
Source: PubMed Central journal article supplement (PMC6138936; doi:10.1186/s13059-018-1512-3), 2018-09-14
Supplement: 13059_2018_1512_MOESM1_ESM.pdf [file 13059_2018_1512_MOESM1_ESM.pdf]

## Supplementary Figures S1-S11 and Tables S1, S5

### Alternative splicing links histone modifications to stem cell fate decision

Yungang Xu<sup>1,2</sup>, Weiling Zhao<sup>1,2</sup>, Scott D. Olson<sup>3</sup>, Karthik S. Prabhakara<sup>3</sup>, Xiaobo Zhou<sup>1,2\*</sup>

<sup>1</sup>Center for Computational Systems Medicine, School of Biomedical Informatics, The University of Texas Health Science Center at Houston, TX, 77030, USA

<sup>2</sup>Center for Bioinformatics and Systems Biology, Wake Forest School of Medicine, Winston-Salem, NC 27157, USA

<sup>3</sup>Department of Pediatric Surgery, McGovern Medical School, The University of Texas Health Science Center at Houston, Houston, TX 77030, USA

\*Correspondence: [xiaobo.zhou@uth.tmc.edu](mailto:xiaobo.zhou@uth.tmc.edu)

**Keywords:** alternative splicing, histone modification, embryonic stem cell, cell fate decision, cell cycle machinery

**Email addresses:**

YX: [yungangx.xu@uth.tmc.edu](mailto:yungangx.xu@uth.tmc.edu)

WZ: [weiling.zhao@uth.tmc.edu](mailto:weiling.zhao@uth.tmc.edu)

KP: [Karthik.Prabhakara@uth.tmc.edu](mailto:Karthik.Prabhakara@uth.tmc.edu)

SO: [scott.d.olson@uth.tmc.edu](mailto:scott.d.olson@uth.tmc.edu)

XZ: [xiaobo.zhou@uth.tmc.edu](mailto:xiaobo.zhou@uth.tmc.edu)

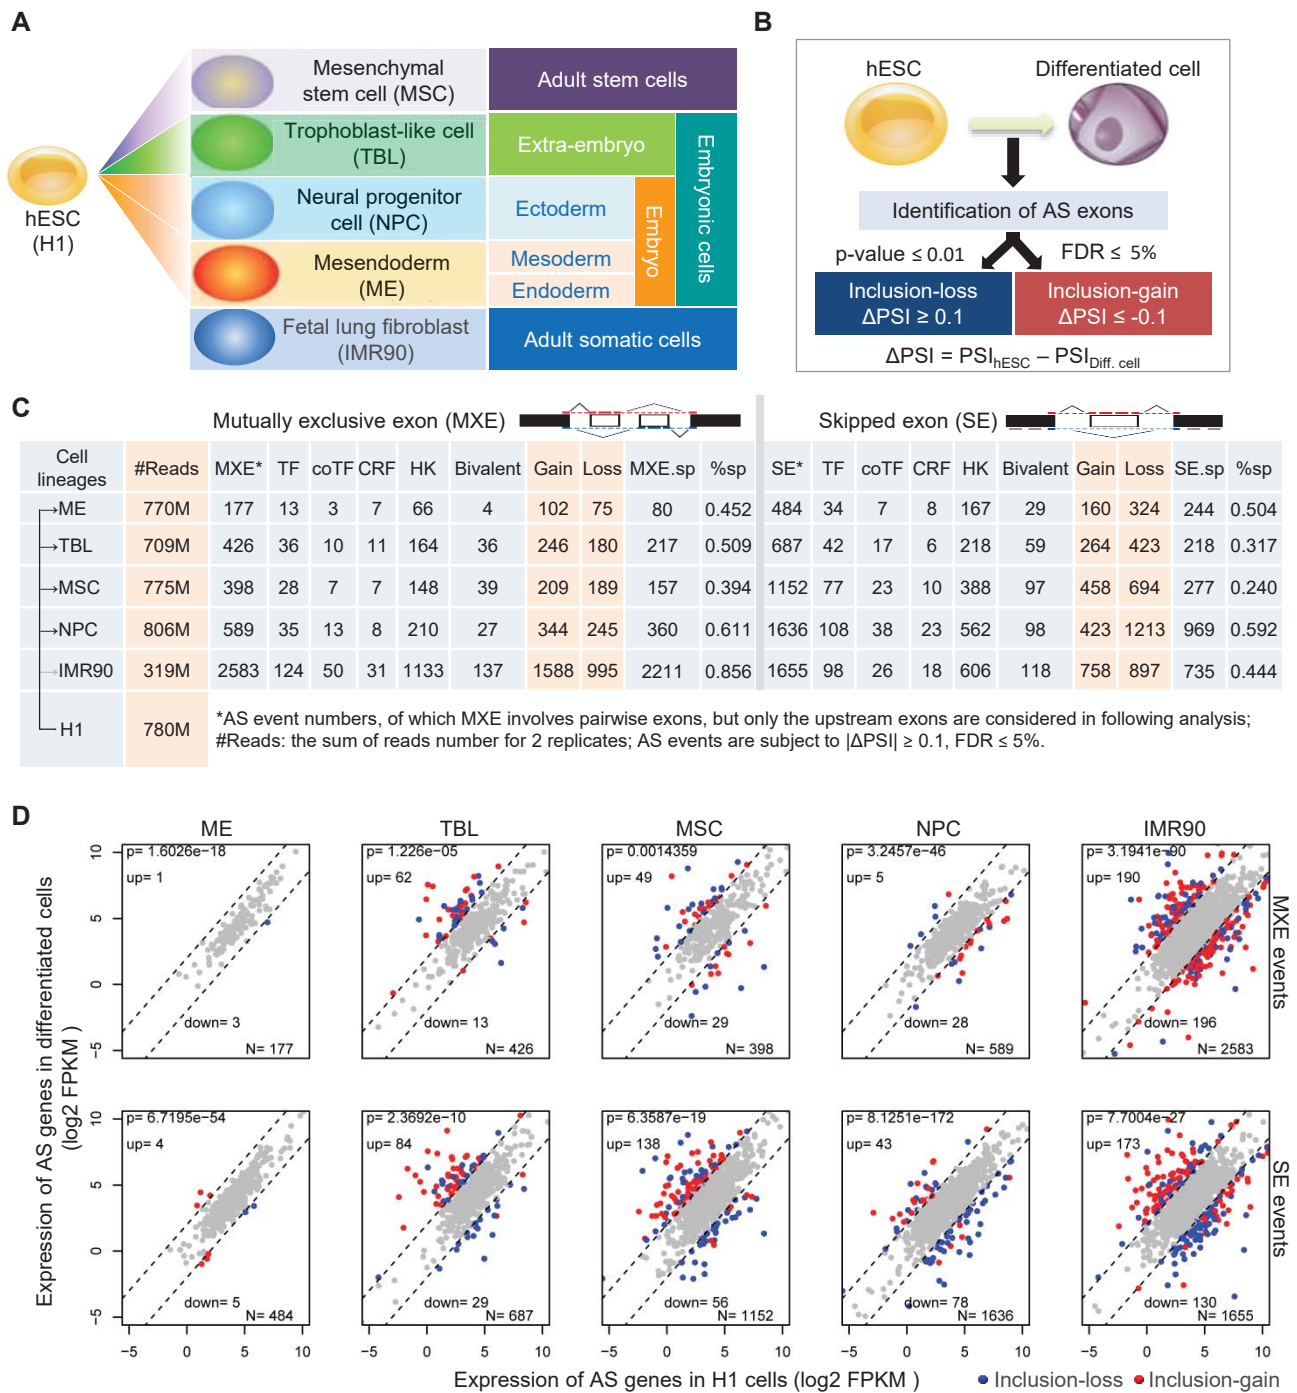

**Figure S1. Identifying hESC differentiation-related AS exons.** (A) The schematic of hESC differentiation and a summary of the histological relations between the six cell types considered in this study. Pair-wised comparing differentiated cells with hESCs represents multiple differentiation lineages. (B) The identification of AS exons upon hESC differentiation. The AS exons were identified if their changes of 'percent spliced in' ( $\Delta\text{PSI}$ s) are greater than 0.1 (inclusion-loss) or smaller than -0.1 (inclusion-gain) between H1 and differentiated cells with the FDRs are less than 5%. (C) The statistics of hESC differentiation-related AS events. TF, transcription factor; coTF, transcription co-factor; CRF, chromatin remodeling factor; HK, housekeeping gene. Gain or loss, inclusion-gain or -loss AS events; MXE.sp and SE.sp, lineage-specific MXE and SE events, respectively; %sp, percentage of lineage-specific AS events. (D) The majority of genes hosting the AS exons are not differentially expressed between H1 cells and differentiated cells (fold change  $< 2$ ); p-values show the significances based on hypergeometric test; N, the number of involved AS events; up or down, the number of AS events that their hosting genes are up- or down-regulated upon hESC differentiation.

Related to **Figure 1**.

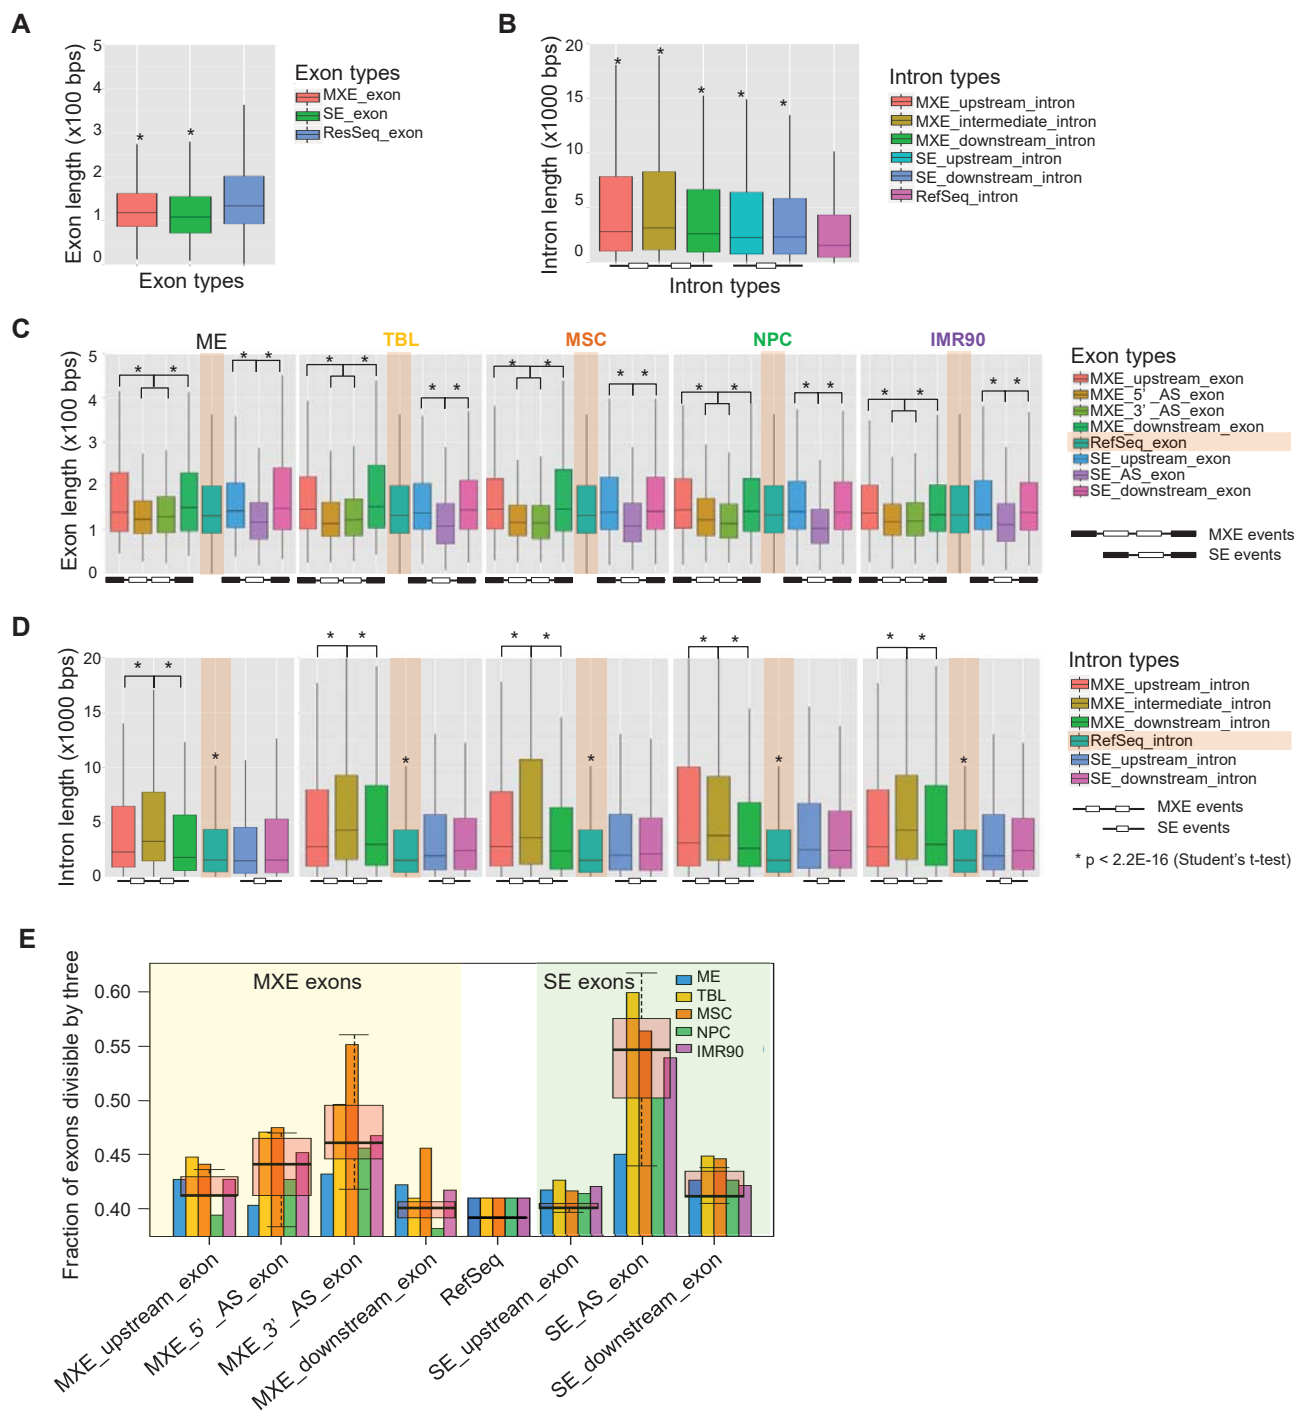

**Figure S2. The hESC differentiation-related AS exons possess the typical properties of AS exons. (A)** The average length of AS exons is much shorter than that of all exons based on RefSeq annotation. **(B)** The average length of adjoining introns of AS exons is much longer than that of all introns based on RefSeq annotation. **(C)** The length of AS exons is much shorter than that of the neighboring up- or down-stream constitutive exons across all cell lineages and AS types. **(D)** The length of introns between MXE exons is much longer than that of the introns aside the AS exons and that of all introns based on RefSeq annotation. The introns surrounding SE exons are much longer than the average intron length based on RefSeq. **(E)** The length of AS exons is more often divisible by three than flanking constitutive splicing (CS) exons or all RefSeq exons. Boxplots for pooled exons of all cell types in each category.

Related to Figure 1.

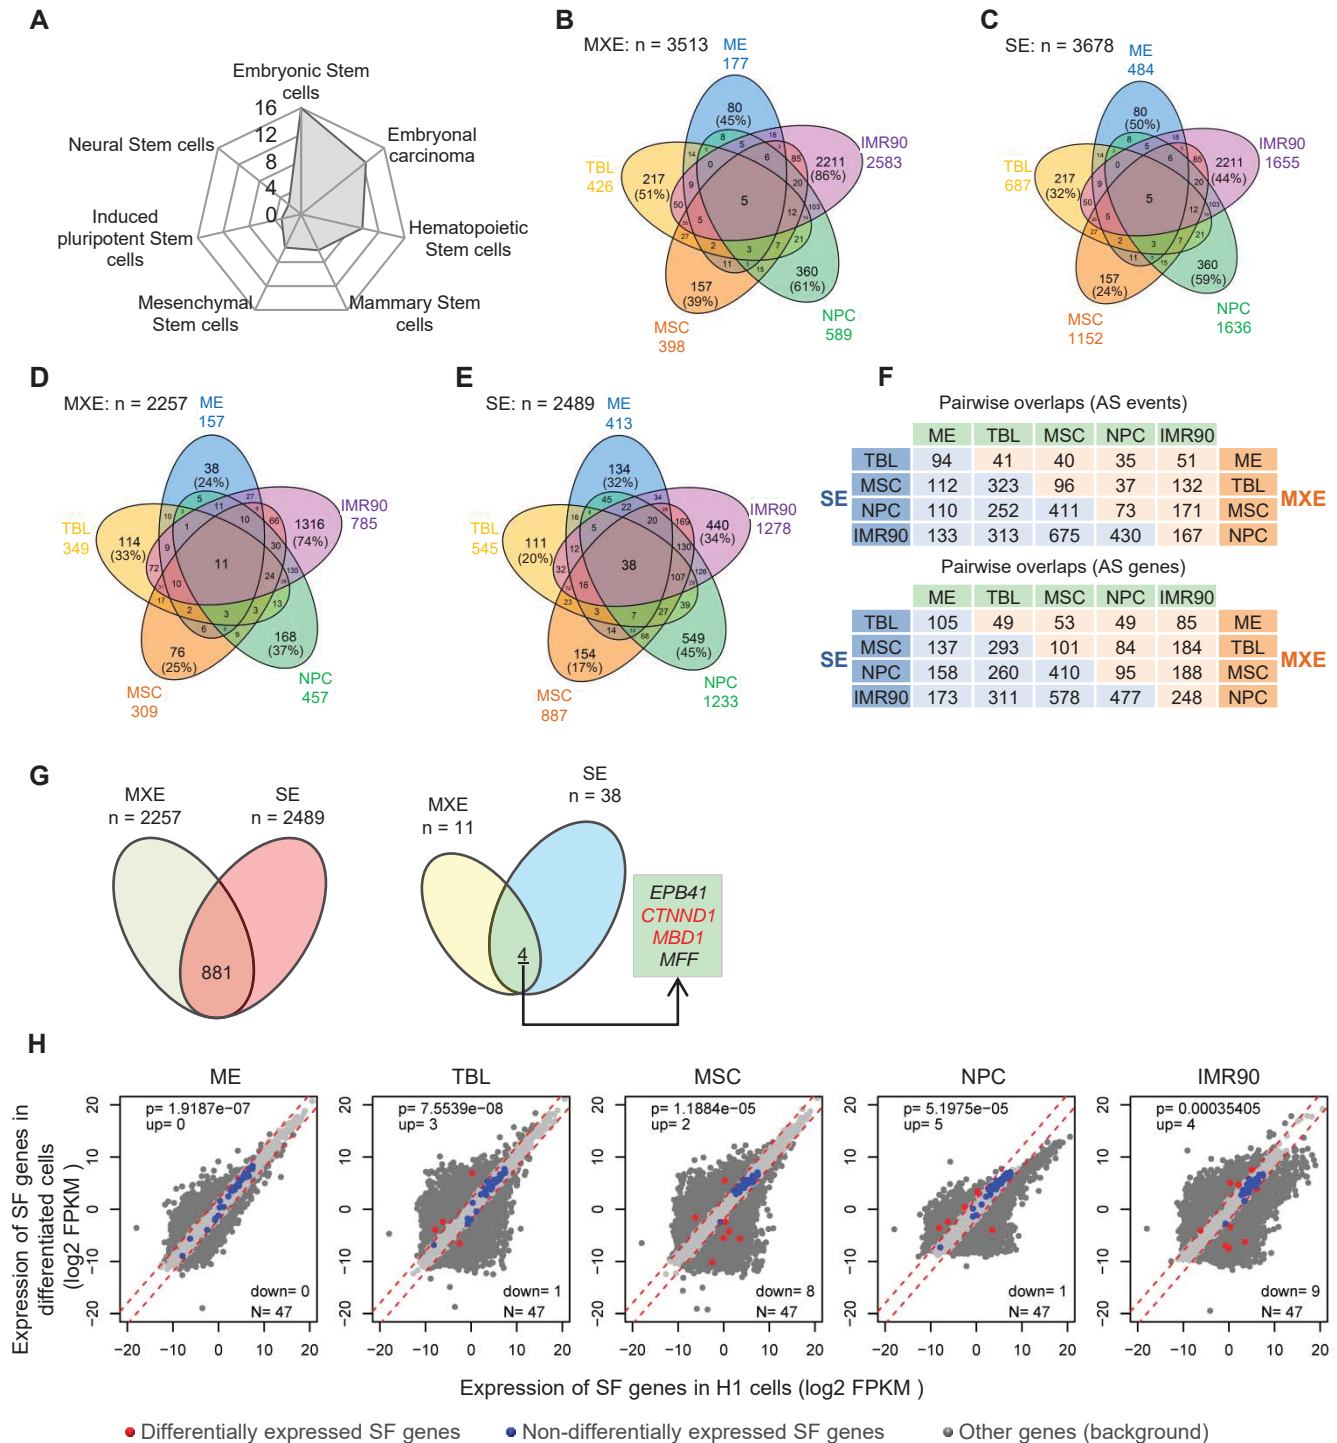

**Figure S3. AS profiles upon hESC differentiation show lineage-specific splicing pattern.** (A) Enrichment analysis of all AS genes based on a manually curated stemness signature gene set, showing hESC differentiation-related AS genes are significantly associated with stemness, especially, of ESCs ( $-\log_{10}$  Bonferroni adjusted p-values). (B) and (C) Venn graphs show the overlaps of MXE and SE events between different cell lineages. Numbers indicate the count of events for each part and percentage in parentheses show the lineage-specific percentages. (D) and (E) Venn graphs showing the overlapping of MXE and SE AS genes between different cell lineages. Numbers indicate the number of genes for each part and percentage in parentheses show the lineage-specific percentages. (F) Pairwise overlaps of AS events (upper) or AS genes (lower) between different cell lineages. (G) The overlaps between SE and MXE AS genes, as well as the overlap between the inter-lineage shared MXE and SE AS genes. Genes in red have been reported that their AS events are involved in mouse ESC differentiation. (H) Few SF genes are differentially expressed between H1 cells and differentiated cells (fold change < 2); p-values show the significances based on hypergeometric test; N, the number of selected SF genes; up or down, the number of SF genes that are up- or down-regulated upon hESC differentiation.

Related to Figure 1.

**A** ME

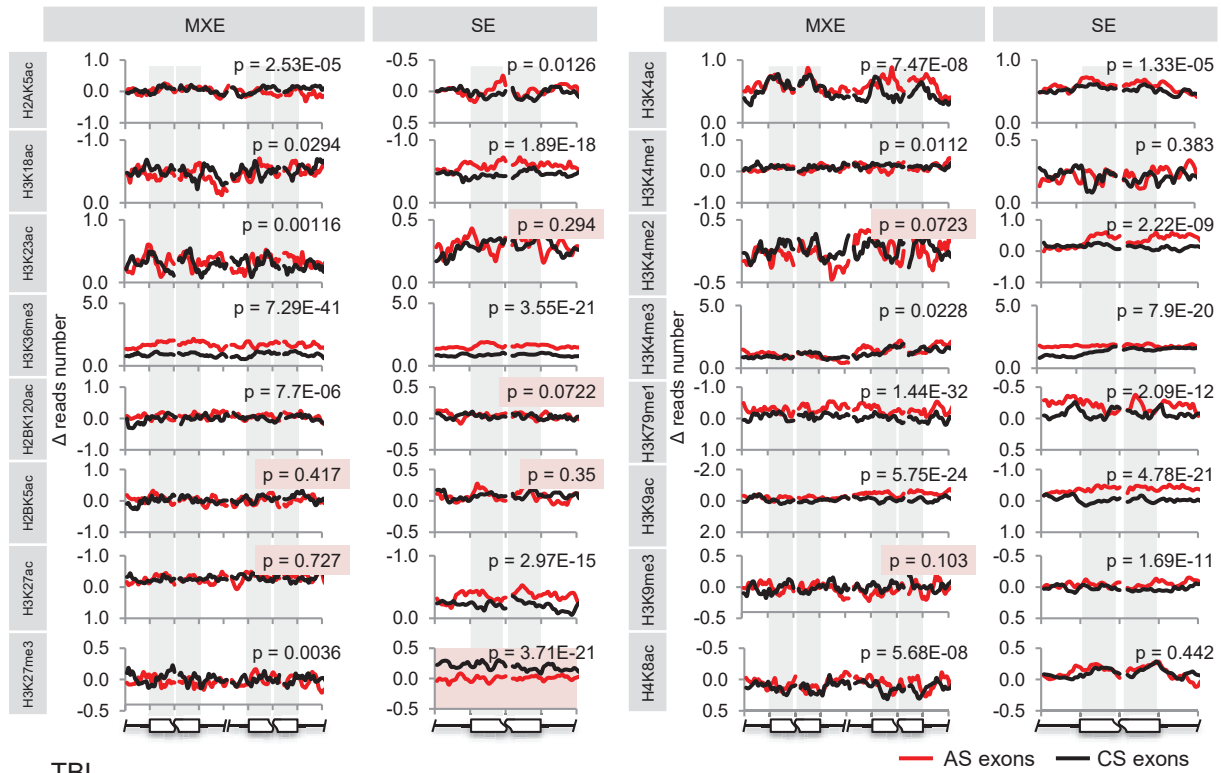

**B** TBL

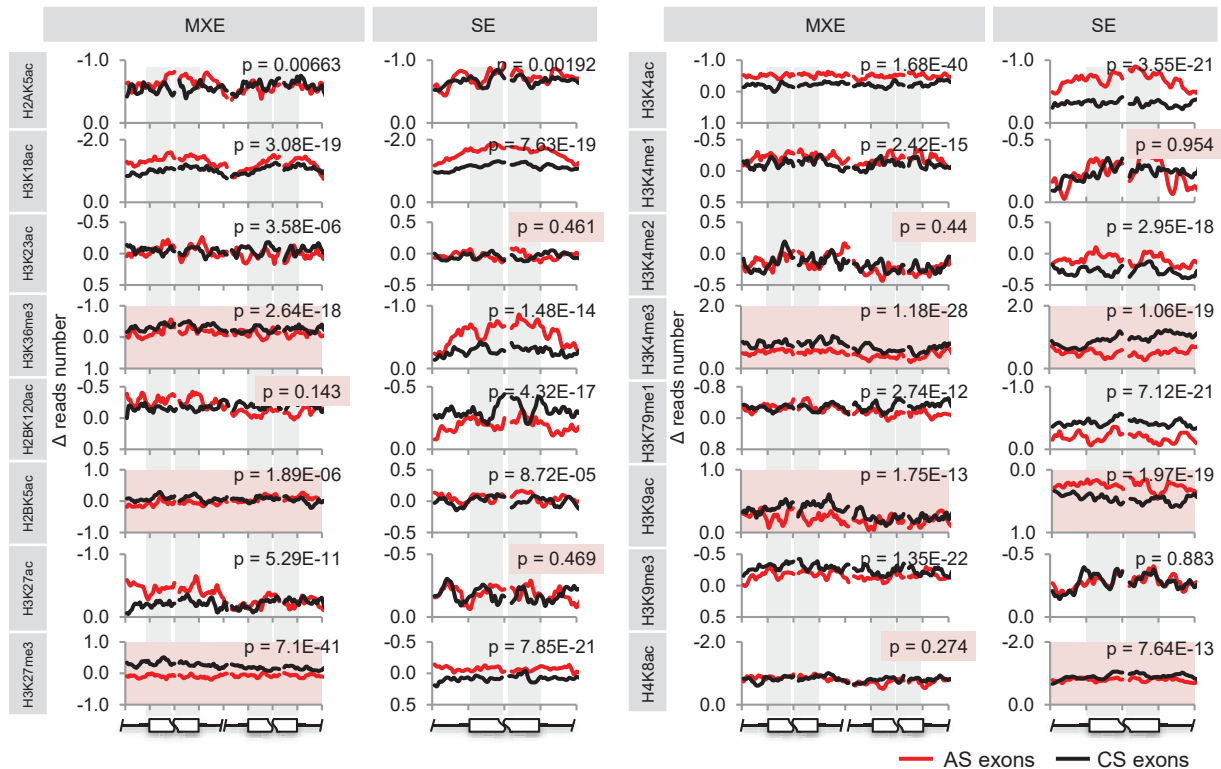

**Figure S4. Histone modifications (HMs) change significantly around the alternatively spliced (AS) exons upon hESC differentiation. (A-F)** The global profiles of HM changes (normalized  $\Delta$  reads number) around the AS exons and randomly selected constitutive splicing (CS) exons during the differentiation from H1 ESCs to ME (A), TBL (B), MSC (C), NPC (D), or compared to IMR90 (E), as well as pooled them together (F);  $\pm 150$ bp regions of the splice sites (exons-intron boundaries) were considered and 15bp-binned to produce the curves. The p-values with red shading indicate no significant difference between AS and constitutive exons; Red-shaded panels indicate the cases that HMs change more significantly around constitutive exons rather than around the AS exons. p-values, Mann-Whitney-Wilcoxon test.

Related to **Figure 2**.

Figure S4 continue.

C MSC

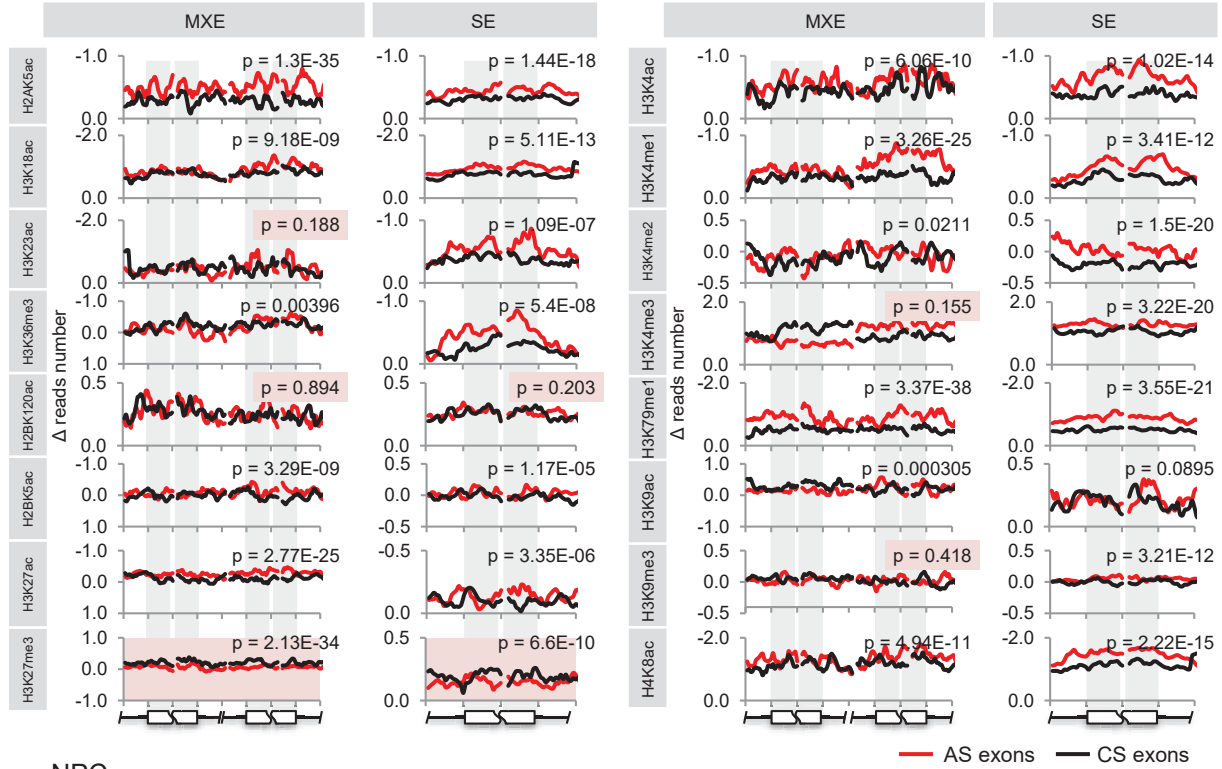

D NPC

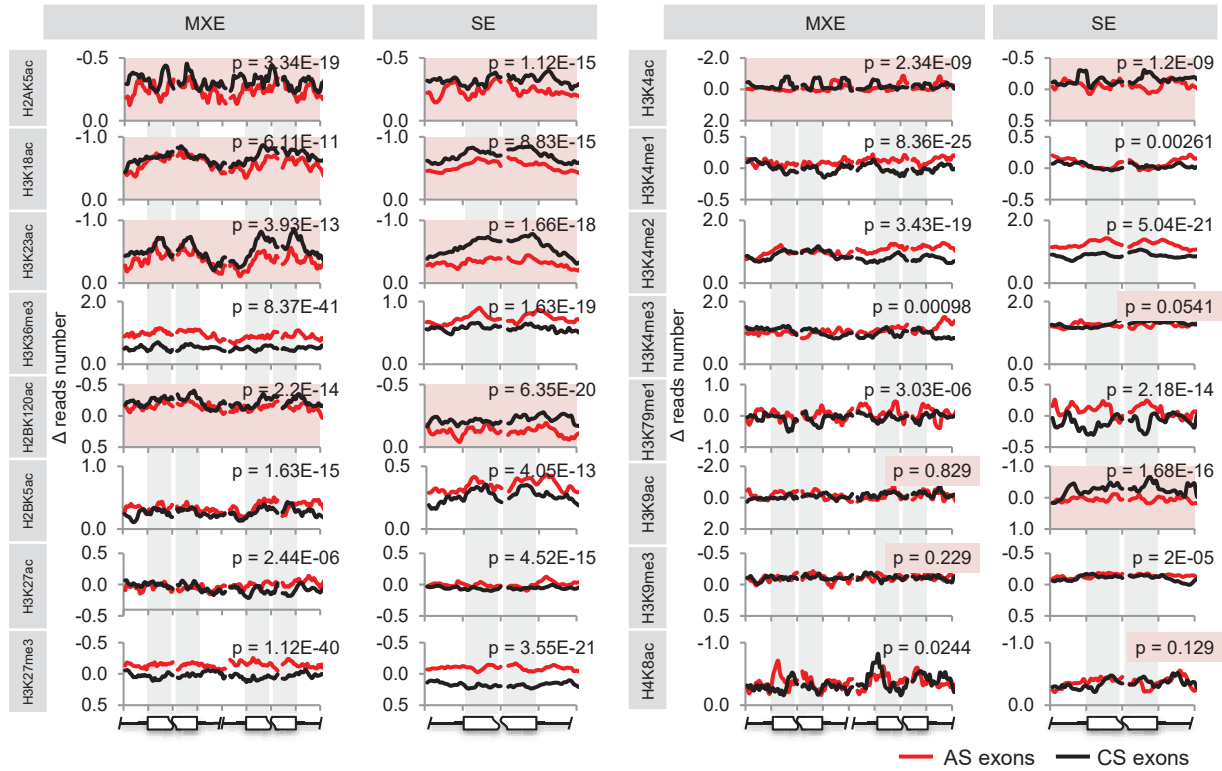

Figure S4 continue.

E IMR90

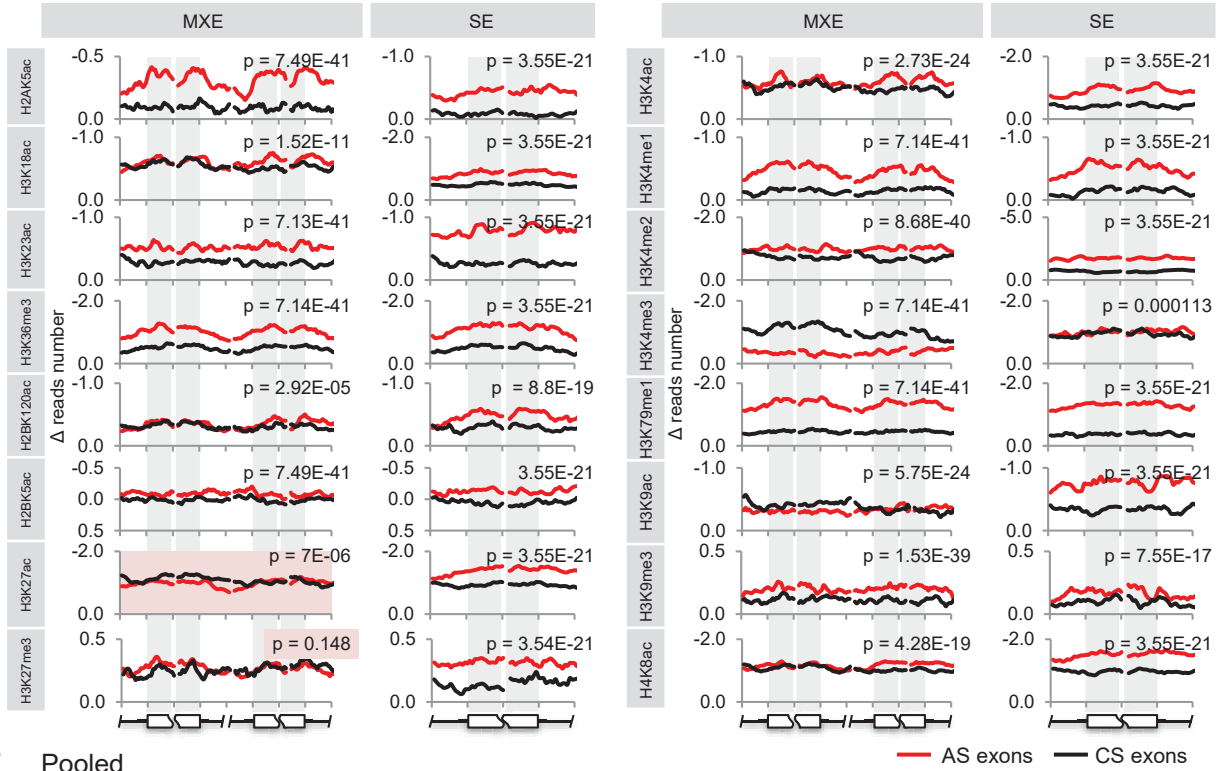

F Pooled

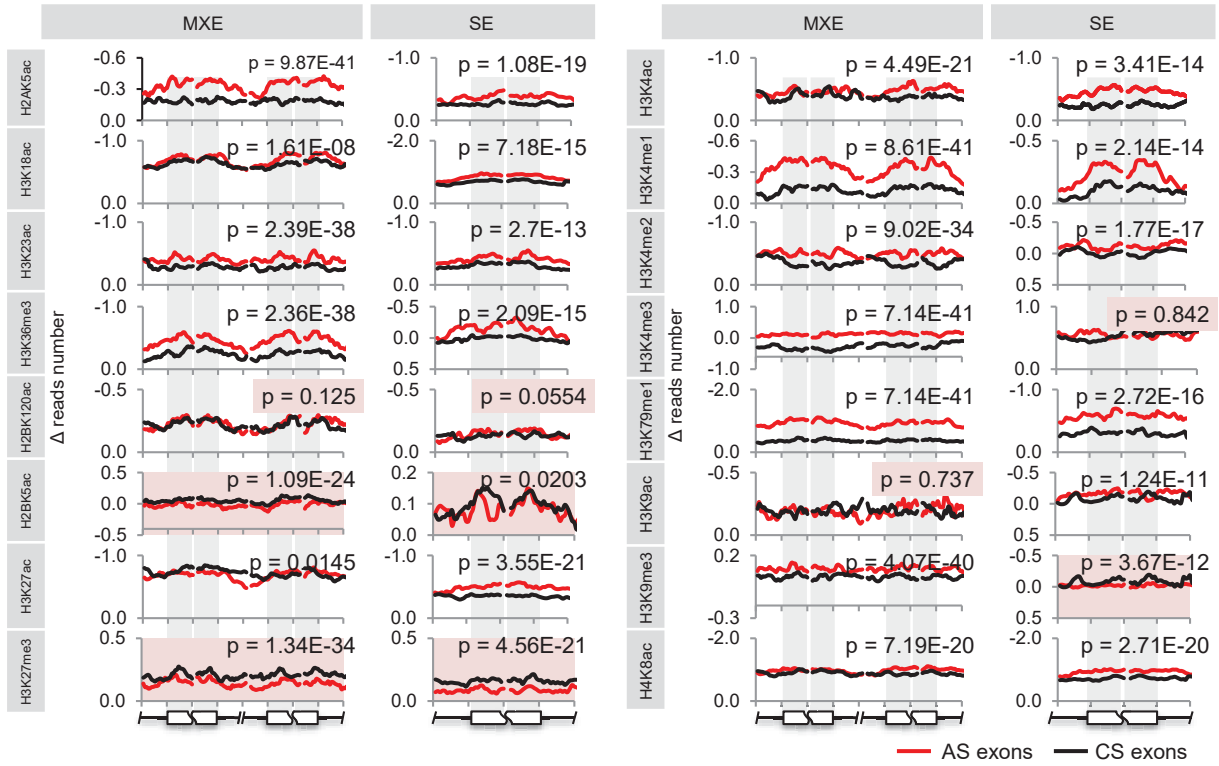

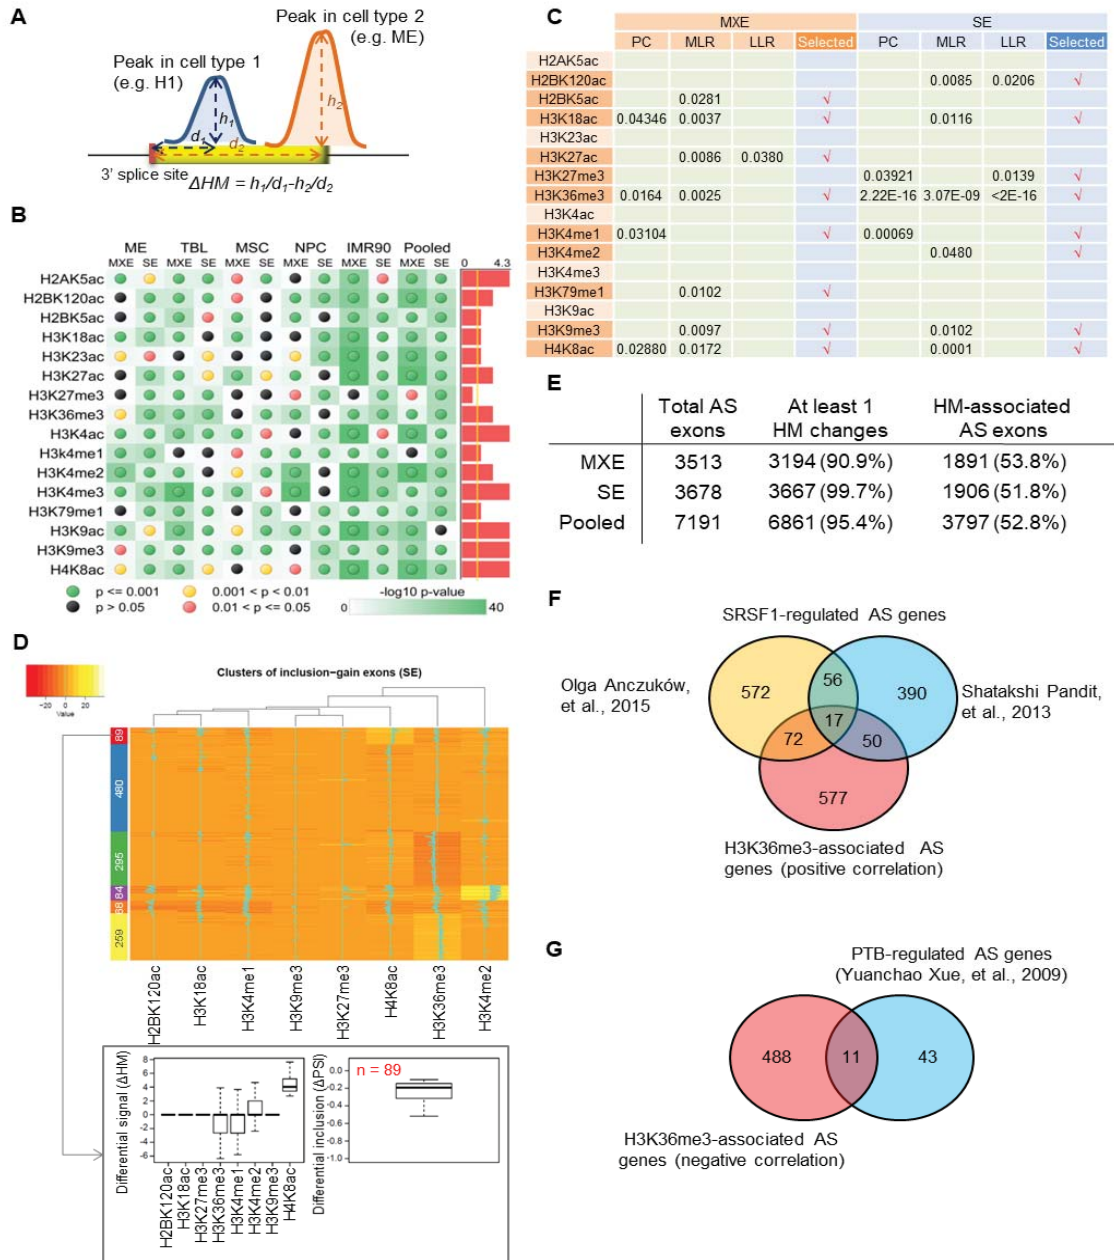

**Figure S5. A subset of AS events is significantly associated with some HMs upon hESC differentiation.** (A) The differential ChIP-seq signal of a HM ( $\Delta HM$ ) was defined as the difference of the summit heights of narrow peaks between two cell types, which were normalized by the distances (in kbs) from the peak summit to the 3' splice site. (B) The statistic significances of changes for all 16 HMs in each cell lineage and pooling them together (pooled), represented as the  $-\log_{10}$  p-values based on Mann-Whitney-Wilcoxon test between the HM profiles of inclusion-gain and inclusion-loss AS exons. The side bars represent the significances whether the changes of HMs are consistently differentially enriched in inclusion-gain and inclusion-loss AS exons across cell lineages, showing the link strength between AS and HMs as the  $-\log_{10}$  p-value based on Fisher's exact test. The yellow vertical line indicates the significance cutoff of 0.05. (C) Three correlation test methods were used to preselect the HMs that may associate with AS; '✓' indicates the HMs passing the test ( $p \leq 0.05$ ) and will be considered for further quantitative analysis. PC, Pearson correlation; MLR, multiple linear regression; LLR, logistic regression. (D) A representative  $k$ -means clustering result of SE 'inclusion-gain' exons based on selected epigenetic features, showing one of the six clusters exhibits negative correlation between the differential H4K8ac signal and the inclusion level changes of 89 SE exons. (E) The statistic of the AS exons with at least one HM changes upon differentiation ( $|\Delta HM| > 0$ ) and the HM-associated exons. The % in parentheses shows the percentage against the total AS exon number. (F) and (G) The overlaps between H3K36me3-associated AS genes and those from other literatures showing the potential mechanism by which H3K36me3 takes the role in AS regulation via proper chromatin-adaptor systems. The indicated references are given in the main text.

Related to **Figure 3**.



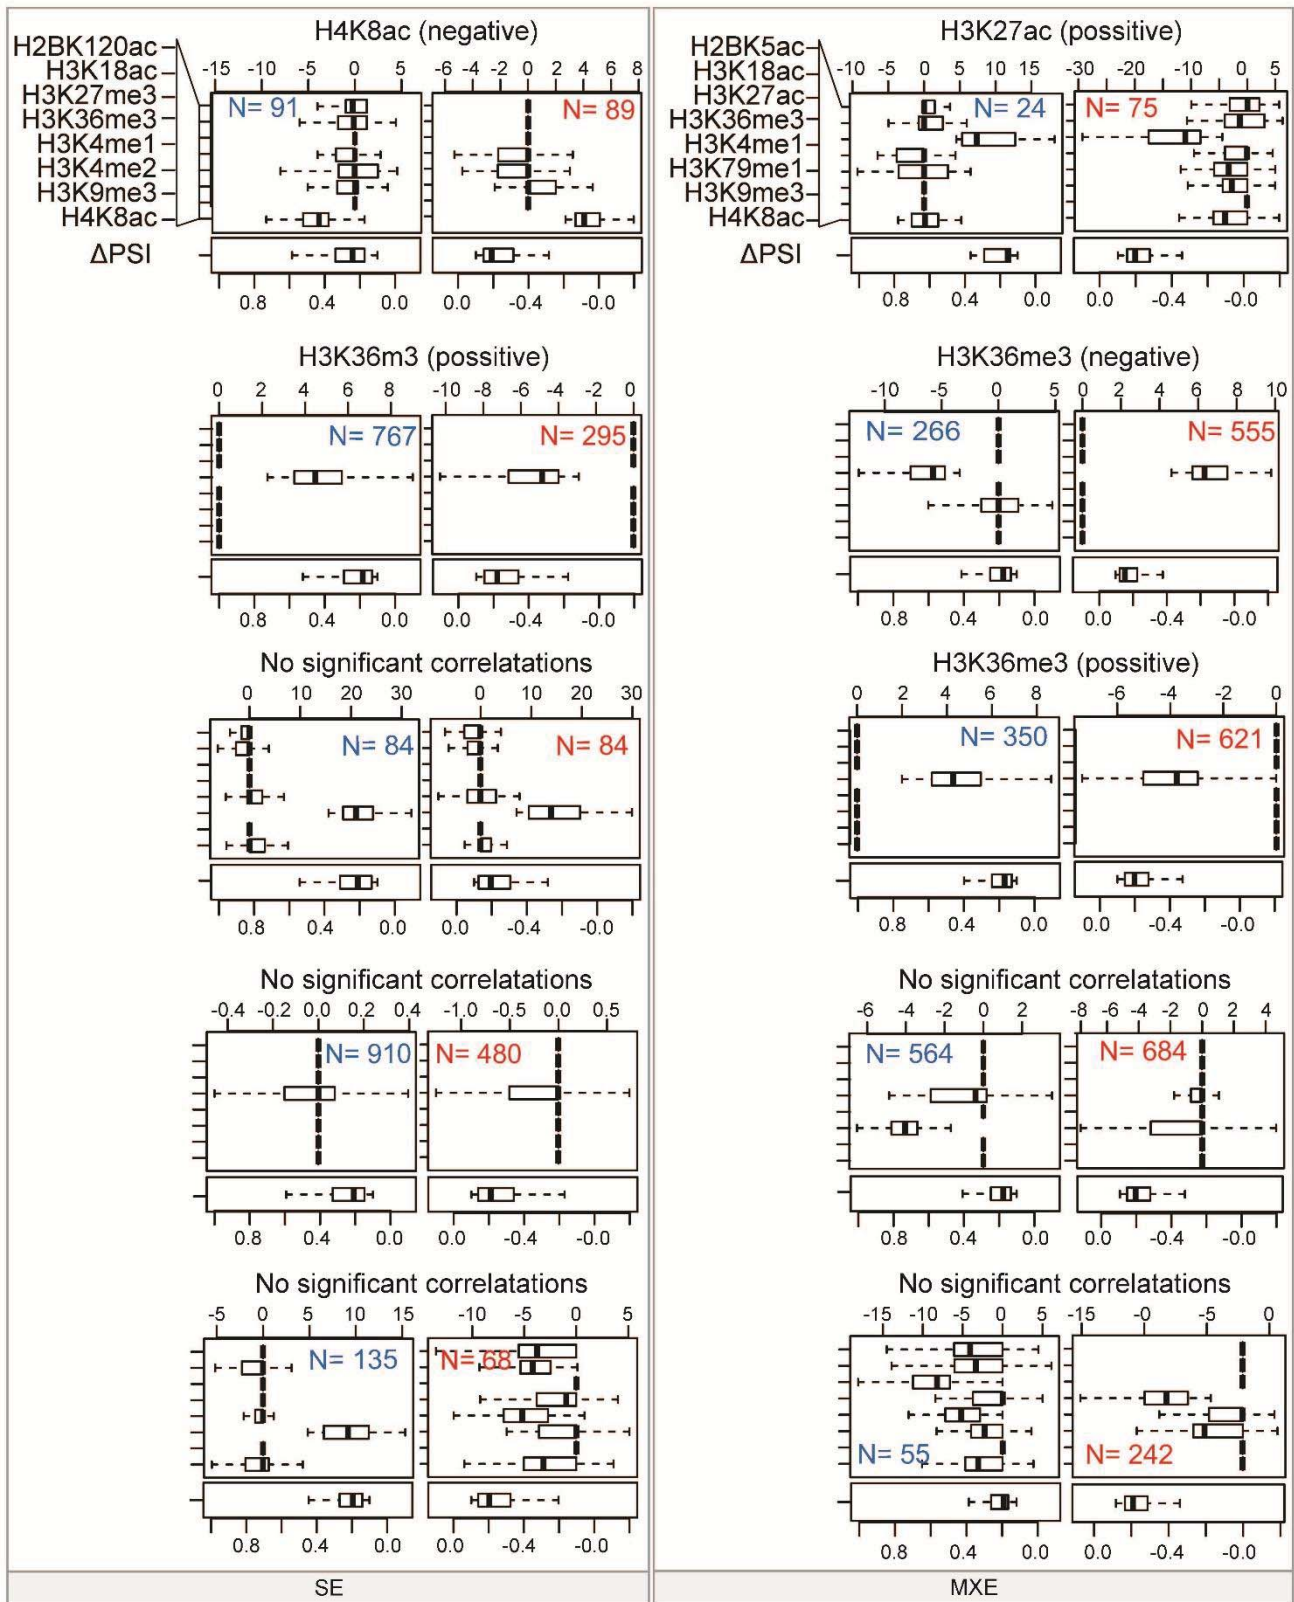

**Figure S6. K-means clustering based on selected epigenetic features of eight HMs for MXE and SE AS exons.** Each panel represents one subset of exons identified by *k*-means clustering, showing the boxplots of differential signals ( $\Delta$ HMs) and corresponding differential inclusion levels ( $\Delta$ PSIs). The number of exons present in each cluster is indicated in the boxplot, with blue refers to the inclusion-loss exons and red the inclusion-gain exons.

Related to **Figure 3**.

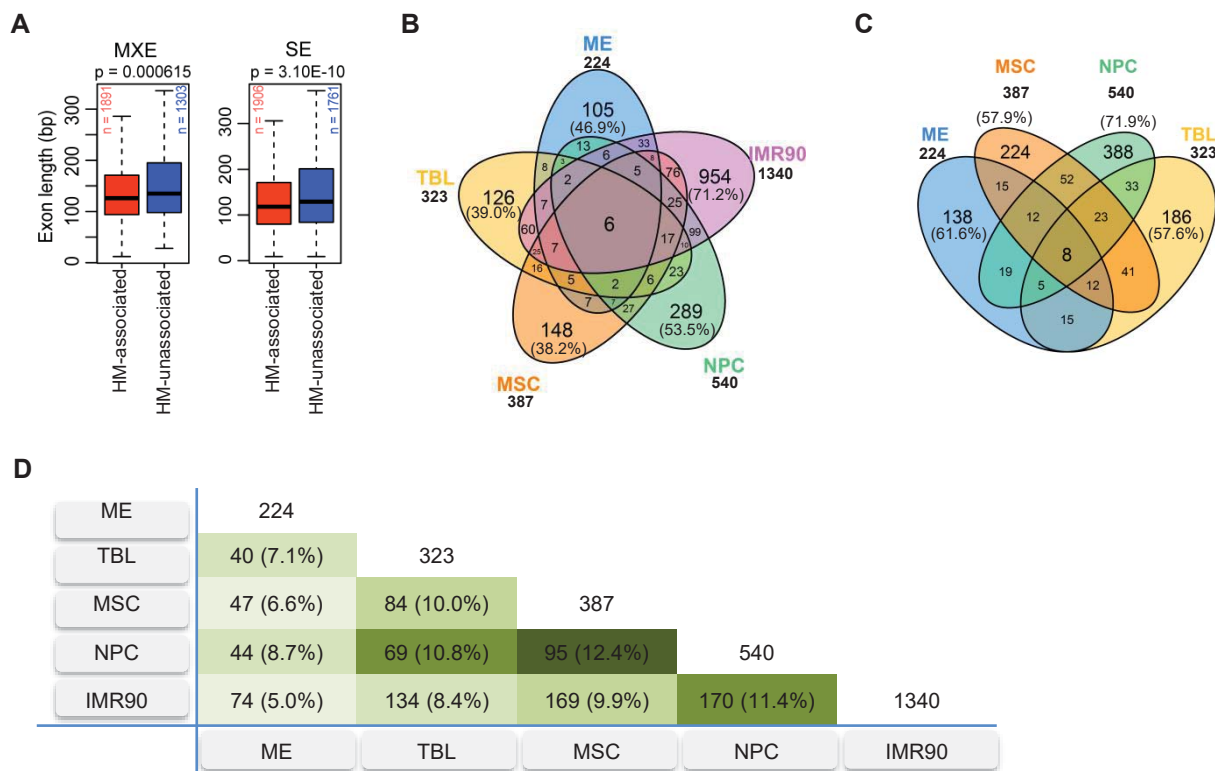

**E**

| Name         | Description                                           | UniProtKB/Swiss-Prot function                                                                                                                                                                |
|--------------|-------------------------------------------------------|----------------------------------------------------------------------------------------------------------------------------------------------------------------------------------------------|
| BARD1        | BRCA1 Associated RING Domain 1                        | This gene encodes a protein which interacts with the N-terminal region of BRCA1. Plays a central role in the control of the cell cycle in response to DNA damage.                            |
| NASP         | Nuclear Autoantigenic Sperm Protein (Histone-Binding) | H1 histone binding protein that is involved in transporting histones into the nucleus of dividing cells. Required for DNA replication, normal cell cycle progression and cell proliferation. |
| MARK2        | MAP/Microtubule Affinity-Regulating Kinase 2          |                                                                                                                                                                                              |
| SF3A3        | Splicing Factor 3a, Subunit 3, 60kDa                  | Subunit of the splicing factor SF3A required for A complex assembly formed by the stable binding of U2 snRNP to the branchpoint sequence (BPS) in pre-mRNA.                                  |
| TRAM1        | Translocation Associated Membrane Protein 1           | Serine/threonine-protein kinase involved in cell polarity and microtubule dynamics regulation.                                                                                               |
| TRIM36       | Tripartite Motif Containing 36                        | E3 ubiquitin-protein ligase which mediates ubiquitination and subsequent proteasomal degradation of target proteins. Involved in chromosome segregation and cell cycle regulation.           |
| <u>ACAA1</u> | Acetyl-CoA Acyltransferase 1                          | This gene encodes an enzyme operative in the beta-oxidation system of the peroxisomes.                                                                                                       |
| <u>PNISR</u> | PNN-Interacting Serine/Arginine-Rich Protein          | A protein coding gene. GO annotations related to this gene include poly(A) RNA binding.                                                                                                      |

**Figure S7. HM-associated AS genes are more lineage-specific.** (A) The length of HM-associated AS exons are much shorter than that of HM-unassociated AS exons. p-values, student's t-test. (B) Venn graph shows the overlap of HM-associated AS genes across all cell lineages, indicating more lineage specificity compared with all AS genes shown in Figure S3D, E. (C) Venn graph shows the overlap of HM-associated AS genes across cell lineages excluding the IMR90. (D) Pairwise overlaps of HM-associated AS genes across cell lineages. The percentages (%) in parentheses show the ratio between the number of pairwise intersection and union, which were used to define the shading darkness. (E) The most common HM-associated AS genes shared by all lineages. The last two underlined genes are the additional ones not shared by IMR90.

Related to **Figure 4**.

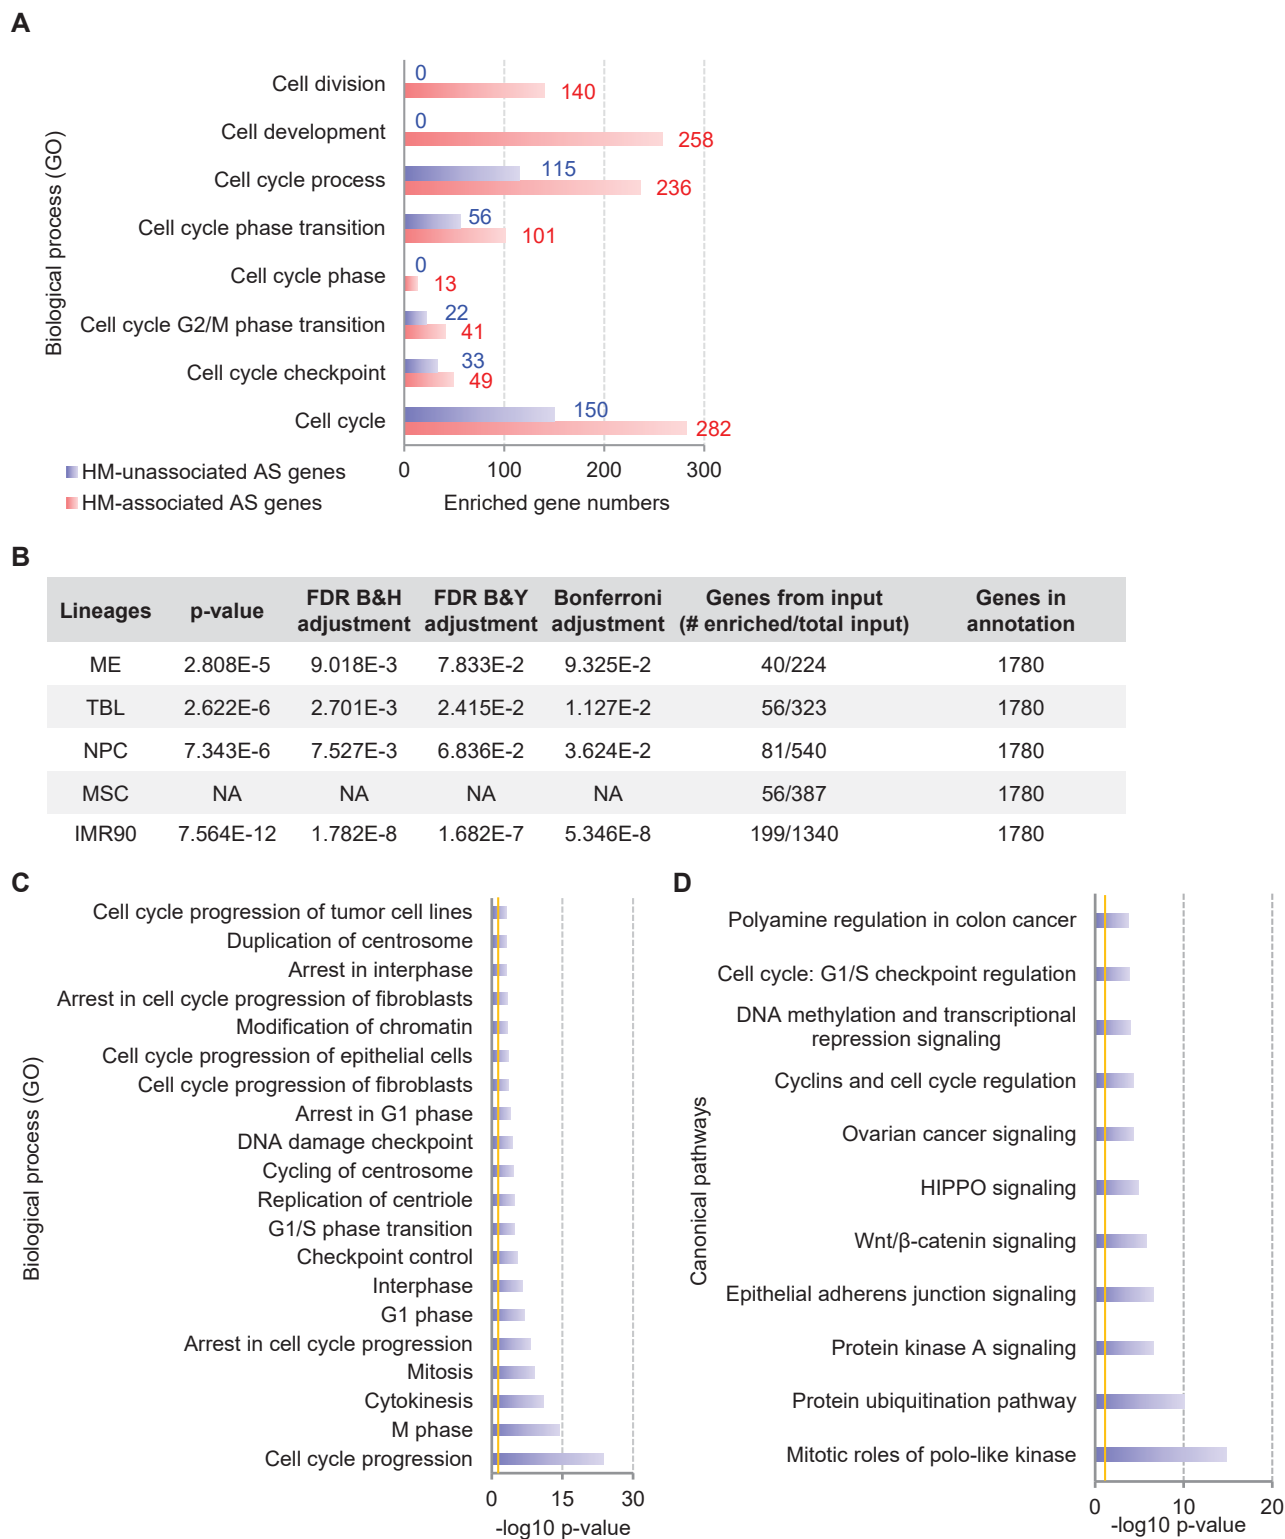

**Figure S8. HM-unassociated AS genes are enriched in G1 cell-cycle phase and pathways for self-renewal.** (A) Gene ontology (GO) enrichment analysis shows HM-associated AS genes are more enriched in cell-cycle progression than HM-unassociated AS genes, shown as the enriched gene numbers of each subgroup. (B) The enrichments in cell cycle of HM-associated AS genes are consistent across cell lineages, with the MSC as an exception. (C) HM-unassociated AS genes involved in cell-cycle progression prefer to function in G1 phase and cell-cycle arrest, shown as the  $-\log_{10}$  p-values after FDR ( $\leq 0.05$ ) adjustment. (D) The enriched canonical pathways show HM-unassociated AS genes are related more with G1 phase and Wnt/ $\beta$ -catenin signaling, which are important for self-renewal. The vertical lines (yellow) indicate the significance cutoff of 0.05.

Related to **Figure 4**.

**A**

| Name             | GeneID | Ensembl ID                                            | CCDS ID | UniProt | RefSeq ID                    | mRNA length | Protein length | Protein sequence variation                                                                           |
|------------------|--------|-------------------------------------------------------|---------|---------|------------------------------|-------------|----------------|------------------------------------------------------------------------------------------------------|
| PBX1a / PBX1-001 | 5087   | ENSG00000185630<br>ENST00000420696<br>ENSP00000405890 | 1246    | P40424  | NM_002585<br>NP_002576       | 6918nt      | 430aa          | Canonical sequence<br>Full length: 1-430 aa                                                          |
| PBX1b / PBX1-002 | 5087   | ENSG00000185630<br>ENST00000367897<br>ENSP00000356872 | 55654   | P40424  | NM_001204961<br>NP_001191890 | 6805nt      | 347aa          | 334-347:<br>SSSSFNMSNSGDLF→GYPSPCYQPDRRIQ<br>348-430: missing<br>Full length: 1-347aa                |
| PBX1c / PBX1-020 | 5087   | ENSG00000185630<br>ENST00000627490<br>ENSP00000405892 | 55653   | P40424  | NM_001204963<br>NP_001191892 | 4162nt      | 420aa          | 401-420: ANGGWQDATTSSVTSPTTEG →<br>HLPRHPRQAHYHFRLLPTWHP<br>420-430: missing<br>Full length: 1-420aa |

nt: nucleotide; aa: amino acid

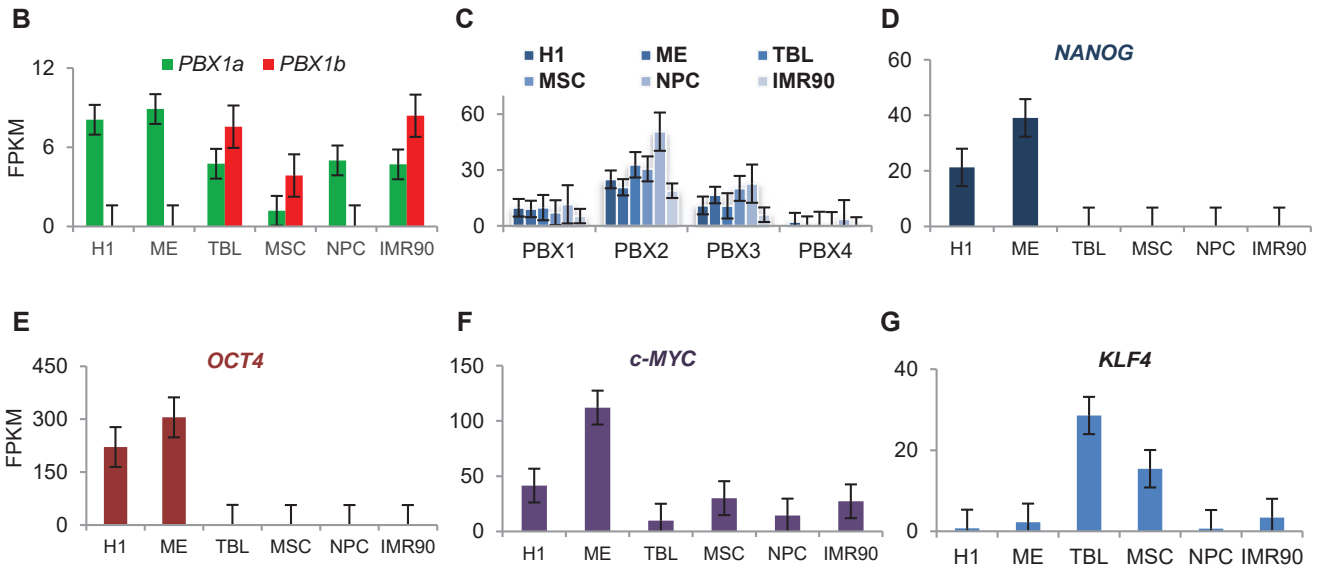

**Figure S9. Isoform switch from PBX1a and PBX1b during hESC differentiation.** (A) The sequence information of transcript and protein isoforms of PBX1. (B) The expression levels of isoforms *PBX1a* and *PBX1b* in hESCs and differentiated cells. The error bars represent standard error of the mean (SEM, n = 2). (C) The expression levels of PBX family genes show no significant difference across cell types (2-fold change as cutoff). (D-G) The expression levels of Yamanaka factors in six studied cell types.

Related to **Figures 5 and 6.**

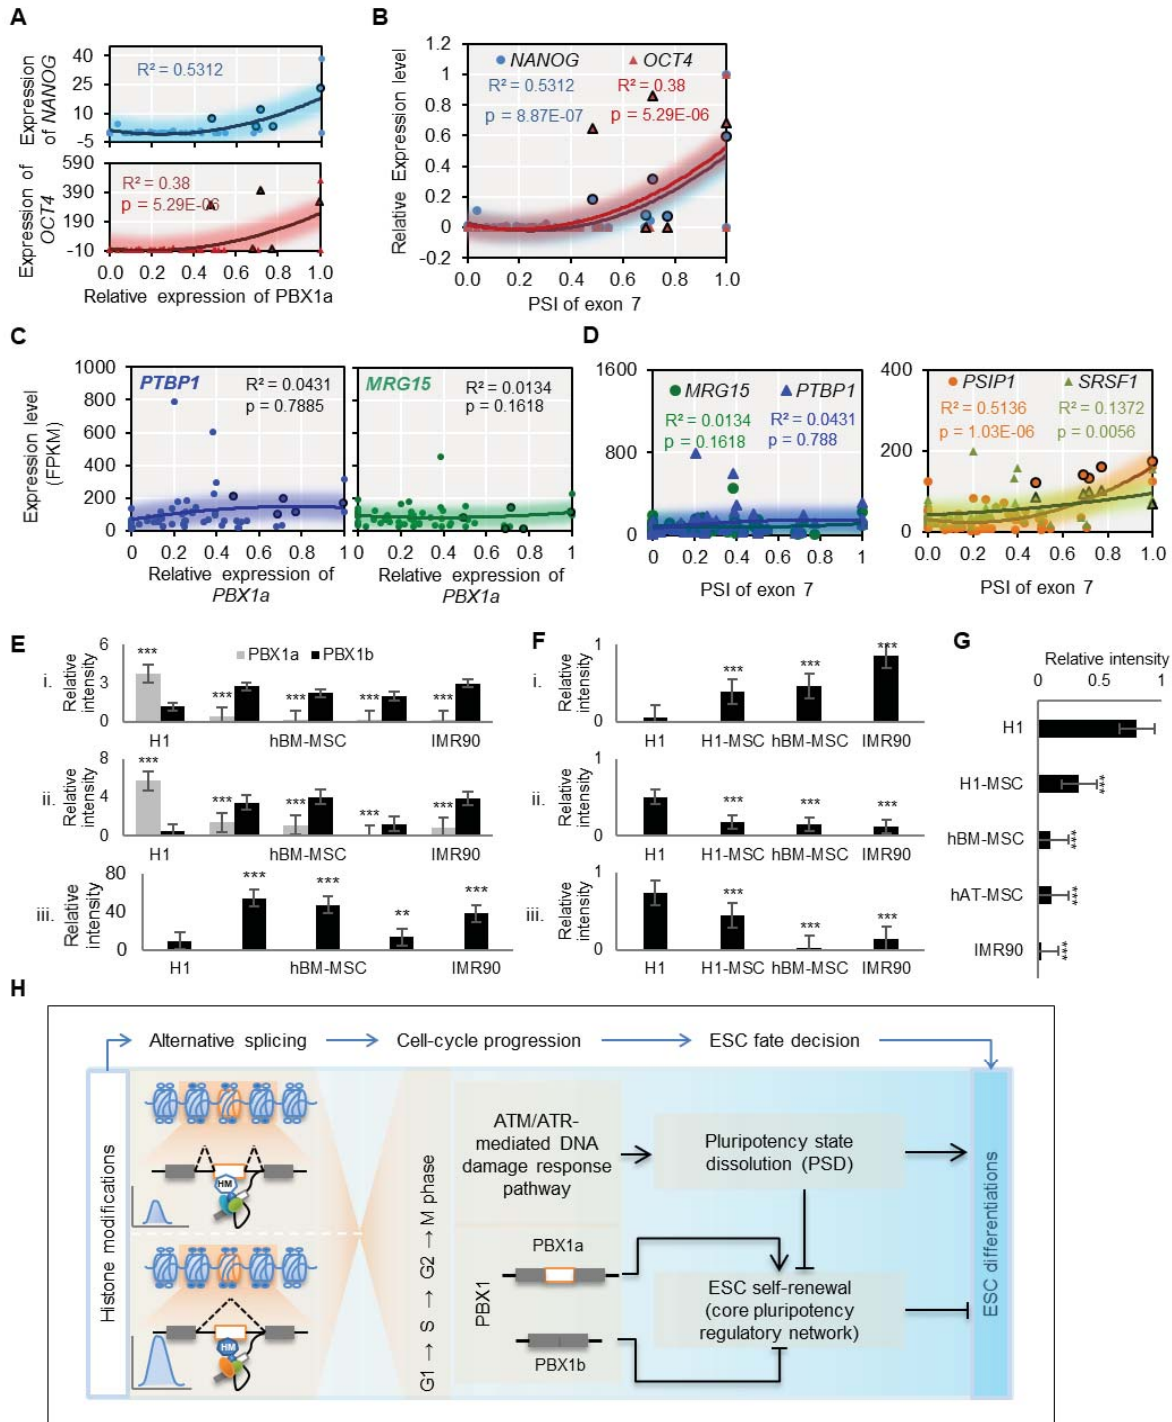

**Figure S10. Isoform switch of PBX1 links H3K36me3 to hESC fate decision.** (A) The expression levels of NANOG and OCT4 genes are significantly positive correlated with the expression of PBX1a, shown as the relative expression levels. (B) The expression levels of NANOG and OCT4 genes are significantly positive correlated with the PSI of exon 7 for PBX1. (C) No significant correlations between the expression levels of PTB/MRG15 and PBX1a are observed. (D) The correlations for the expression levels of *PTB/MRG15* (insignificant) and *PSIP1/SRSF1* (significant) with the inclusion level of exon 7 of PBX1. (E) The relative expressions of PBX1a and PBX1b based on bands in gel images of RT-PCR and western blotting's, represented as the relative band intensities normalized by bands of  $\beta$ -Actin. Related to Figure 6B. (F) The relative signals of ChIP-PCR assays, represented as the relative band intensity v.s. the input bands. Related to Figure 6C i-iii. (G) The relative signals of RIP-PCR assays, represented as the relative band intensity v.s. the input bands. Related to Figure 6D. The error bars indicate the standard deviations of three replicates. Asterisks represent the significances based on ANOVA. \*\*,  $p < 0.01$ ; \*\*\*,  $p < 0.001$ . (H) The presented mechanism conveying the HM information into cell fate decision through the AS of cell-cycle factors or the core components of pathways that controlling cell-cycle progression.

Related to **Figures 5 and 6.**

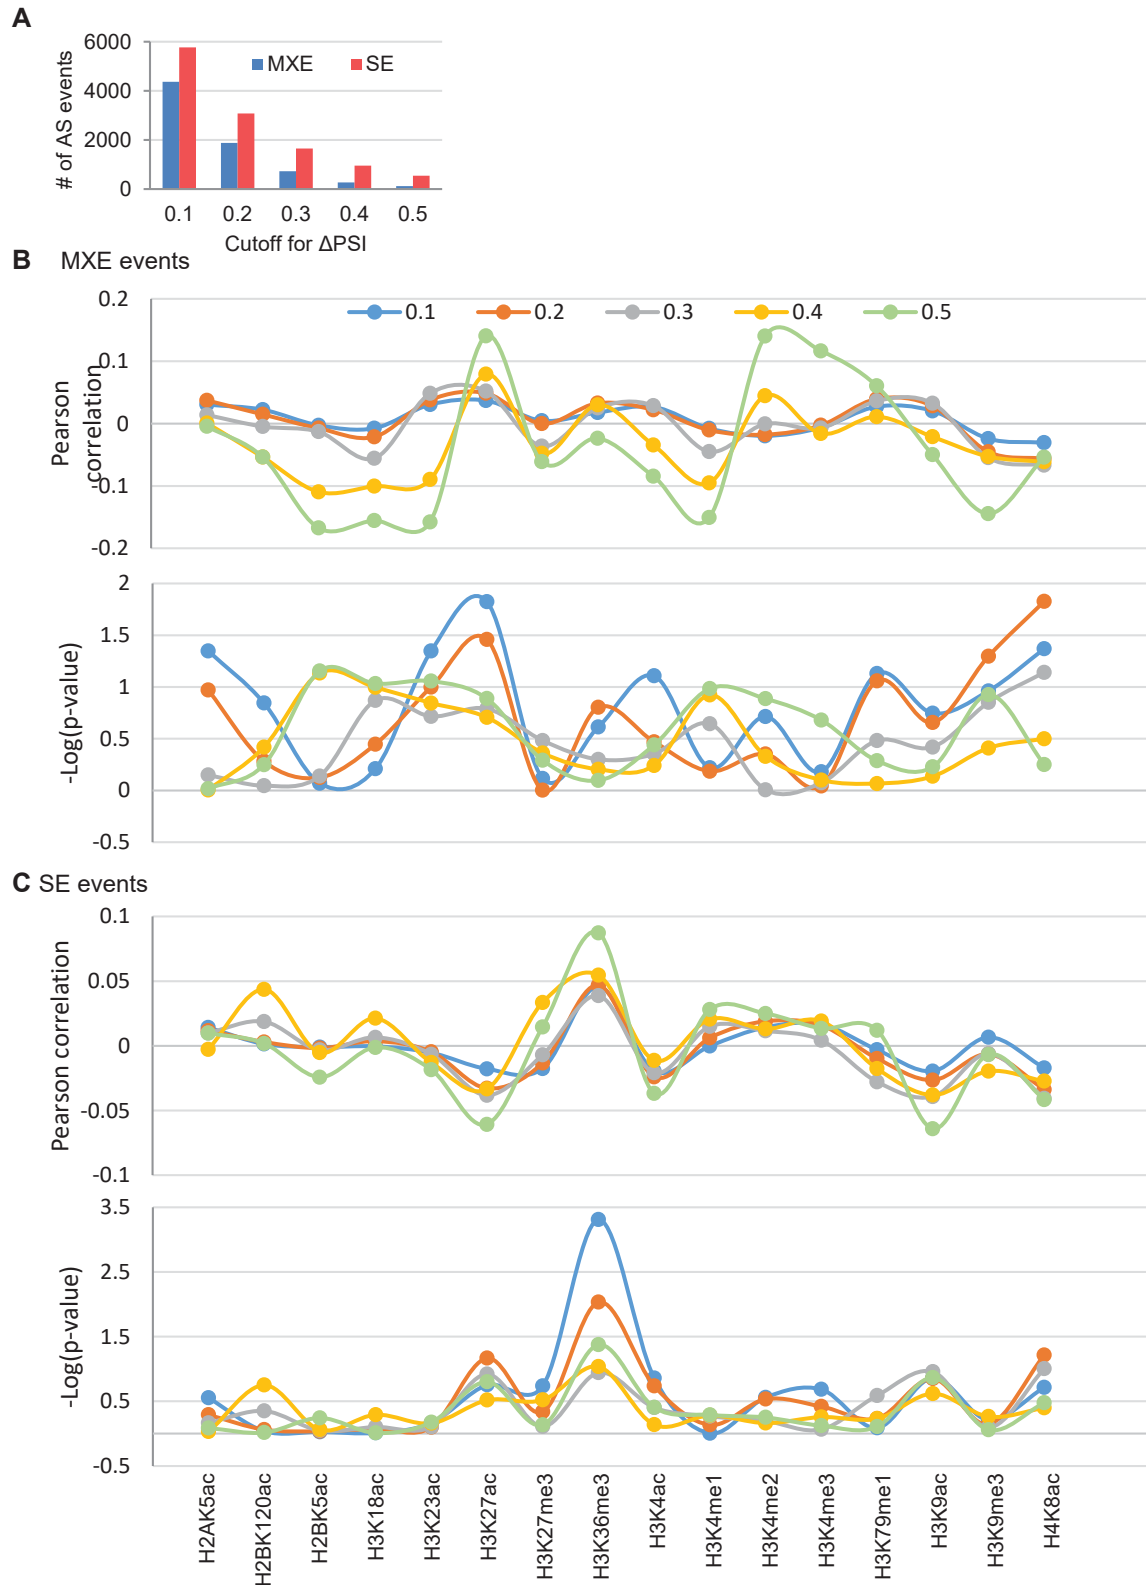

**Figure S11. The effect of  $\Delta$ PSI cutoffs for AS-HM correlations.** (A) The number of identified AS events decrease significantly with increasing of the  $\Delta$ PSI cutoff. (B) The effect of  $\Delta$ PSI cutoffs for AS-HM correlations of MXE events. (B) The effect of  $\Delta$ PSI cutoffs for AS-HM correlations of MXE events. The upper panels of (B) and (C) represent the Pearson correlation and lower panels represent the log p-values of correlation test using R function `cor.test()`.

**Table S1. The number of all AS events identified during hESC differentiation.**

| <b>AS types</b> | <b>ME</b>   | <b>TBL</b>  | <b>MSC</b>  | <b>NPC</b>  | <b>IMR90</b> |
|-----------------|-------------|-------------|-------------|-------------|--------------|
| MXE             | 177         | 426         | 398         | 589         | 2583         |
| SE              | 484         | 687         | 1152        | 1636        | 1655         |
| A5SS            | 360         | 466         | 608         | 596         | 1124         |
| A3SS            | 357         | 465         | 572         | 564         | 1108         |
| ATSS            | 418         | 779         | 914         | 810         | 1221         |
| ATES            | 364         | 640         | 803         | 702         | 935          |
| IR              | 146         | 152         | 226         | 189         | 305          |
| <b>Total</b>    | <b>2306</b> | <b>3615</b> | <b>4673</b> | <b>5086</b> | <b>8931</b>  |

AS types: MXE, mutually exclusive exon; SE, skipping exon; A5SS, alternative 5' splice site; A3SS, alternative 3' splice site; ATSS, alternative transcription start site; ATES, alternative transcription end site; IR, intron retention.

**Table S5. The PCR primers used in this study.**

| Gene name      | Sequences                                               | Product length                 | Assay                                     |
|----------------|---------------------------------------------------------|--------------------------------|-------------------------------------------|
| OCT4           | F:GGAGGAAGCTGACAACAATGA<br>R:CTCTCACTCGGTTCTCGATACT     | 104 bp                         | qRT-PCR (Figure 6A)                       |
| SOX2           | F:TGATGGAGACGGAGCTGAA<br>R:GGGCTGTTTTCTGGTTGC           | 103 bp                         | qRT-PCR (Figure 6A)                       |
| NANOG          | F:TGAAATCTAAGAGGTGGCAGAA<br>R:CCTGGTGGTAGGAAGAGTAAAG    | 108 bp                         | qRT-PCR (Figure 6A)                       |
| KLF4           | F:ACCTACACAAAGAGTTCCCATC<br>R:ATCTGAGCGGCGAATTT         | 108 bp                         | qRT-PCR (Figure 6A)                       |
| C-MYC          | F:CTGAGGAGGAACAAGAAGATGAG<br>R:TGTGAGGAGTTTGCTGTG       | 123 bp                         | qRT-PCR (Figure 6A)                       |
| $\beta$ -actin | F:GGATCAGCAAGCAGGAGTATG<br>R:AGAAAGGGTGTAAACGCAACTAA    | 96 bp                          | qRT-PCR (Figure 6A)                       |
| PBX1           | F:GCCAAGAAGAGTGGCATCACAGTC<br>R:CCCTGCGGACTGTACATCTGACT | 386bp (PBX1a)<br>273bp (PBX1b) | RT-PCR (Figure 6B)<br>RIP-PCR (Figure 6D) |
| $\beta$ -actin | F:AGCCATGTACGTTGCTATCC<br>R:CGTAGCACAGCTTCTCCTTAAT      | 266 bp                         | RT-PCR (Figure 6B)                        |
| PBX1 exon7     | F:CCCTTTATTGCTTGCTCTGTTC<br>R:CCCTGTGCTTACTGTTCTTCT     | 536 bp                         | ChIP-PCR (Figure 6C<br>ii-iii)            |
| NANOG promoter | F:TCCTTGGCGAAGAATGTAGTAAG<br>R:CCGGAGAAGATTAAGGATAGGG   | 400 bp                         | ChIP-PCR (Figure<br>6C-i)                 |

All primer sequences are presented in 5'->3'.
